# Supplementary material
Source: publisher site journal article supplement (http://www.spandidos-publications.com/5464/downloadSupplementary)
Supplement: Supplementary file 1 [file downloadSupplementary]

## Sheet: pfscomb
Table S1. The prognostic long non-coding RNAs from Overall Survival analysis and Progression-Free Survival analysis.
Overall survival (355 lncRNAs)							Progression-free survival (167 lncRNAs)
		Univariate analysis		Multivariate analysis					Univariate analysis		Multivariate analysis
order	lncRNA	OS.pval	OS.HazardRatio	OS.pval	OS.HazardRatio		order	lncRNA	PFS.pval	PFS.HazardRatio	PFS.pval	PFS.HazardRatio
1	AC009014.3	0.01475	0.69(0.51-0.93)	0.0066	0.6449(0.4699~0.8851)		1	AC009014.3	0.001188	0.55(0.38-0.79)	0.0055	0.5757(0.3899~0.8501)
2	AC069513.4	0.0004732	1.72(1.26-2.34)	0.0041	1.6043(1.162~2.2149)		2	AC067959.1	9.072e-10	0.31(0.21-0.46)	0.0012	0.4875(0.3157~0.7527)
3	AC104654.2	2.52e-08	2.41(1.75-3.31)	0.0175	1.5457(1.0794~2.2134)		3	AC069513.4	0.005535	1.66(1.16-2.38)	0.0035	1.7692(1.2067~2.594)
4	AC133644.2	4.73e-05	1.88(1.38-2.56)	0.0078	1.5697(1.1262~2.1878)		4	CAHM	0.01831	1.53(1.07-2.19)	0.0012	1.874(1.2815~2.7405)
5	AF127936.3	0.0001572	1.8(1.32-2.45)	0.0047	1.5843(1.1518~2.1793)		5	CTD-2201E18.5	0.04708	1.43(1-2.05)	0.0319	1.5118(1.0364~2.2052)
6	AL133493.2	3.56e-05	1.9(1.39-2.58)	0.0328	1.4222(1.0293~1.9651)		6	CTD-3222D19.12	0.0009275	1.83(1.27-2.63)	0.0122	1.6134(1.1099~2.3454)
7	C10orf91	0.00143	1.64(1.21-2.22)	0.0285	1.4265(1.038~1.9603)		7	DSCR9	3.086e-05	2.15(1.49-3.11)	0	2.3574(1.5914~3.4922)
8	C2orf48	0.0009173	1.67(1.23-2.28)	0.0197	1.4693(1.0632~2.0305)		8	FAM225A	4.612e-05	2.12(1.46-3.06)	0.0436	1.5008(1.0118~2.2263)
9	CAHM	2.85e-05	1.91(1.4-2.6)	0	2.1555(1.5596~2.9791)		9	FAM225B	0.0001081	2.03(1.41-2.93)	0.0168	1.6064(1.0891~2.3693)
10	CTA-384D8.35	2.69e-07	2.25(1.64-3.09)	0.033	1.4456(1.0302~2.0284)		10	FLJ35934	0.0107	1.59(1.11-2.29)	0.0235	1.5431(1.0603~2.2457)
11	CTB-193M12.5	1.24e-08	2.47(1.79-3.41)	0.0008	1.7951(1.274~2.5293)		11	KB-1460A1.5	0.001775	1.77(1.23-2.55)	0.0131	1.6257(1.1074~2.3867)
12	CTD-2095E4.5	7.8e-05	1.84(1.35-2.5)	0.0006	1.7507(1.2727~2.4083)		12	LINC00334	0.04018	1.45(1.01-2.08)	0.0455	1.4641(1.0076~2.1274)
13	CTD-2192J16.26	1.23e-05	1.97(1.45-2.69)	0.0001	1.9007(1.3723~2.6325)		13	LINC00652	0.009485	1.6(1.12-2.3)	0.0028	1.7989(1.2233~2.6452)
14	CTD-2201E18.5	9.06e-06	2(1.46-2.74)	0.0001	1.881(1.3594~2.6029)		14	LINC01393	0.00135	1.79(1.25-2.58)	0.018	1.586(1.0824~2.3239)
15	CTD-2319I12.2	9.49e-05	1.84(1.35-2.5)	0.0063	1.5678(1.1355~2.1647)		15	LLNLR-268E12.1	0.02698	1.5(1.04-2.14)	0.0045	1.7304(1.1854~2.5259)
16	CTD-3222D19.12	3.07e-05	1.91(1.4-2.61)	0	1.9897(1.4393~2.7507)		16	RP1-86C11.7	3.46e-05	2.13(1.48-3.08)	0.0009	1.938(1.3121~2.8625)
17	DSCR9	2.64e-07	2.24(1.64-3.08)	0.0001	1.9484(1.3939~2.7235)		17	RP11-309L24.4	0.009881	1.6(1.12-2.3)	0.0161	1.5777(1.0882~2.2875)
18	FAM225A	3.26e-06	2.07(1.51-2.83)	0.0145	1.5179(1.0864~2.1207)		18	RP11-338N10.2	0.004	1.7(1.18-2.44)	0.0155	1.632(1.0978~2.4261)
19	FAM225B	8.47e-07	2.16(1.58-2.96)	0.0005	1.8105(1.2991~2.5231)		19	RP11-430G17.3	0.02907	1.48(1.04-2.12)	0.0408	1.4741(1.0163~2.138)
20	FIRRE	1.89e-08	2.43(1.76-3.34)	0.0002	1.8713(1.3424~2.6085)		20	RP11-557L19.1	0.01043	1.59(1.11-2.28)	0.0056	1.687(1.1653~2.4423)
21	FLJ35934	0.0002674	1.76(1.29-2.4)	0.0013	1.7041(1.2328~2.3556)		21	RP11-670E13.6	0.0009915	1.82(1.27-2.62)	0.0016	1.8681(1.2678~2.7528)
22	KB-1460A1.5	8.03e-05	1.85(1.36-2.53)	0.0025	1.6628(1.1964~2.311)		22	RP5-1198O20.4	0.0008198	1.84(1.28-2.65)	0.0394	1.4955(1.0197~2.1934)
23	LINC00565	0.0002813	1.76(1.29-2.39)	0.0251	1.441(1.0468~1.9835)		23	RP5-965G21.4	0.0007061	1.86(1.29-2.67)	0.0284	1.5372(1.0464~2.2582)
24	LINC00652	0.0004666	1.72(1.27-2.34)	0.0119	1.505(1.0943~2.07)		24	SNHG25	0.04997	1.42(1-2.03)	0.0081	1.6666(1.1417~2.4329)
25	LINC00926	0.0001405	1.81(1.33-2.46)	0.0016	1.6743(1.2146~2.3081)		25	SNHG9	0.004006	1.68(1.18-2.41)	0.026	1.5324(1.0525~2.2313)
26	LINC00937	0.0004271	1.72(1.27-2.34)	0.0076	1.5464(1.1226~2.1302)		26	U47924.32	0.01091	1.59(1.11-2.28)	0.0338	1.4942(1.0312~2.1651)
27	LINC00941	0.0002169	1.77(1.3-2.41)	0.0024	1.6683(1.1981~2.3231)		27	AP001626.1	0.004593	0.6(0.42-0.86)
28	LINC01060	7.17e-05	0.53(0.39-0.73)	0.0397	0.7035(0.5032~0.9836)		28	ATP11AUN	0.002139	0.57(0.4-0.82)
29	LINC01138	1.48e-05	1.97(1.44-2.68)	0.0274	1.4397(1.0414~1.9905)		29	BLACAT1	0.03468	1.47(1.03-2.09)
30	LINC01191	4.15e-05	1.9(1.39-2.6)	0.0026	1.6491(1.191~2.2835)		30	C10orf126	0.0008625	0.55(0.38-0.78)
31	LINC01270	9.25e-07	2.15(1.57-2.94)	0.0004	1.7932(1.2994~2.4745)		31	C20orf203	0.001644	1.78(1.24-2.55)
32	LINC01271	8.51e-07	2.16(1.58-2.95)	0.0026	1.6607(1.1933~2.3114)		32	CECR3	0.04252	0.69(0.48-0.99)
33	LINC01480	6.18e-05	1.87(1.37-2.55)	0.0131	1.5067(1.0901~2.0825)		33	CH17-189H20.1	0.0002617	1.98(1.36-2.87)
34	LINC01605	3.4e-07	2.22(1.62-3.04)	0	2.0726(1.4875~2.8878)		34	CH17-340M24.3	0.01675	1.54(1.08-2.21)
35	LLNLR-268E12.1	0.0002428	1.77(1.3-2.41)	0.0029	1.6308(1.182~2.2499)		35	CH507-513H4.1	0.01665	1.55(1.08-2.22)
36	PART1	0.04362	1.36(1.01-1.85)	0.0043	1.5981(1.1585~2.2046)		36	CH507-513H4.5	0.01565	1.55(1.08-2.22)
37	RP11-104O19.4	0.001477	1.63(1.2-2.21)	0.0084	1.5558(1.1199~2.1615)		37	CITF22-1A6.3	0.03185	1.47(1.03-2.1)
38	RP11-106M7.1	0.0005276	0.58(0.43-0.79)	0.0405	0.7074(0.508~0.9851)		38	CTA-276F8.1	0.004467	1.67(1.17-2.4)
39	RP11-1136G4.2	1.91e-06	2.13(1.55-2.92)	0.0027	1.6624(1.1934~2.3157)		39	CTA-384D8.35	0.0003938	1.92(1.33-2.77)
40	RP11-1275H24.2	0.0001841	1.78(1.31-2.43)	0.0003	1.8097(1.3106~2.4988)		40	CTB-113P19.5	0.0003839	1.92(1.33-2.77)
41	RP11-133F8.2	2.32e-08	0.41(0.3-0.57)	0.0009	0.5557(0.3923~0.787)		41	CTB-193M12.5	1.905e-06	2.43(1.67-3.55)
42	RP11-196G11.2	0.0001804	1.79(1.32-2.44)	0.0001	1.9421(1.3967~2.7005)		42	CTB-61M7.2	0.01861	1.53(1.07-2.18)
43	RP11-214N9.1	0.0003227	1.74(1.28-2.36)	0.0008	1.7409(1.2577~2.4098)		43	CTC-231O11.1	0.03267	0.68(0.47-0.97)
44	RP11-265E18.1	2.19e-09	2.59(1.87-3.58)	0	2.0505(1.4657~2.8685)		44	CTC-236F12.4	0.001602	0.56(0.39-0.81)
45	RP11-285E9.6	0.002613	1.59(1.17-2.15)	0.002	1.6484(1.2012~2.2621)		45	CTC-360G5.9	0.003079	0.58(0.4-0.84)
46	RP11-287D1.4	0.02828	1.4(1.03-1.89)	0.0433	1.3798(1.0098~1.8854)		46	CTC-444N24.8	0.0001837	1.99(1.38-2.88)
47	RP11-309L24.4	0.0001622	1.79(1.32-2.44)	0.0003	1.8186(1.3118~2.5213)		47	CTC-497E21.3	0.02334	0.66(0.46-0.95)
48	RP11-383I23.2	5.18e-05	1.88(1.38-2.56)	0	2.0905(1.5029~2.9079)		48	CTC-513N18.6	0.01028	0.63(0.44-0.9)
49	RP11-430G17.3	1.78e-06	2.1(1.54-2.86)	0.0001	1.9116(1.386~2.6364)		49	CTC-523E23.4	0.000287	0.51(0.36-0.74)
50	RP11-458F8.4	1.77e-06	2.12(1.55-2.91)	0	2.0301(1.4651~2.8129)		50	CTC-559E9.1	0.0004882	0.52(0.36-0.76)
51	RP11-462L8.1	1.45e-07	2.28(1.66-3.13)	0.0004	1.8578(1.3171~2.6204)		51	CTC-559E9.4	0.001055	0.55(0.38-0.79)
52	RP11-467P9.1	0.0001996	1.77(1.31-2.41)	0.0003	1.818(1.3174~2.5087)		52	CTC-573N18.1	0.00453	1.69(1.17-2.43)
53	RP11-47I22.2	4.58e-08	2.38(1.73-3.28)	0.0006	1.8113(1.2897~2.5437)		53	CTC-786C10.1	0.006991	0.61(0.42-0.88)
54	RP11-557L19.1	0.04604	1.36(1-1.84)	0.0049	1.571(1.1471~2.1514)		54	CTD-2015G9.2	0.04285	0.69(0.49-0.99)
55	RP11-563N4.1	0.000141	1.8(1.32-2.45)	0.0024	1.6635(1.198~2.3099)		55	CTD-2017D11.1	0.00284	0.58(0.41-0.83)
56	RP11-572O17.1	9.8e-07	2.15(1.57-2.94)	0	1.9657(1.4224~2.7166)		56	CTD-2035E11.4	0.01236	1.57(1.1-2.25)
57	RP11-58E21.3	0.0007796	1.68(1.24-2.29)	0.0407	1.3978(1.0144~1.9261)		57	CTD-2035E11.5	0.007457	1.63(1.14-2.34)
58	RP11-620J15.3	0.0001365	1.82(1.33-2.48)	0.0105	1.5243(1.1036~2.1055)		58	CTD-2078B5.2	0.009793	0.62(0.44-0.9)
59	RP11-629O1.2	1.42e-06	2.14(1.56-2.94)	0.0027	1.6606(1.1925~2.3123)		59	CTD-2145A24.5	4.04e-07	2.59(1.77-3.8)
60	RP11-631N16.4	2.14e-06	2.1(1.53-2.86)	0	2.0817(1.4992~2.8907)		60	CTD-2245F17.3	0.01224	0.63(0.44-0.91)
61	RP11-670E13.6	9.14e-09	2.49(1.8-3.43)	0	2.1533(1.534~3.0225)		61	CTD-2331H12.7	0.01829	1.54(1.07-2.2)
62	RP11-723O4.9	0.00128	1.65(1.21-2.24)	0.0087	1.5357(1.1147~2.1158)		62	CTD-2337I7.1	0.0003446	1.92(1.34-2.77)
63	RP11-806H10.4	1.7e-07	2.27(1.66-3.12)	0.0087	1.5759(1.1219~2.2137)		63	CTD-2341M24.1	0.001908	1.76(1.23-2.53)
64	RP11-89H19.2	2.05e-07	0.44(0.32-0.61)	0.005	0.6162(0.4395~0.8638)		64	CTD-2342N23.3	0.04253	1.44(1.01-2.06)
65	RP11-92G12.3	0.001298	1.65(1.21-2.24)	0.0029	1.6237(1.1807~2.233)		65	CTD-2541J13.1	0.03183	0.68(0.47-0.97)
66	RP11-93H24.3	1.01e-05	1.99(1.46-2.72)	0	2.2127(1.5917~3.076)		66	CTD-2554C21.2	0.003194	0.58(0.4-0.84)
67	RP13-463N16.6	2.54e-06	2.08(1.52-2.85)	0	2.0157(1.4523~2.7976)		67	CTD-2554C21.3	0.03017	0.67(0.47-0.96)
68	RP13-516M14.4	0.0004545	1.72(1.27-2.34)	0.0006	1.7526(1.2727~2.4135)		68	CTD-2619J13.17	9.307e-06	0.43(0.29-0.63)
69	RP13-942N8.1	3.27e-05	1.9(1.4-2.59)	0.0006	1.7845(1.2807~2.4866)		69	CTD-2620I22.3	0.001772	1.78(1.23-2.56)
70	RP4-665J23.1	6.09e-08	2.37(1.72-3.28)	0.0319	1.4567(1.0331~2.0539)		70	CTD-2666L21.1	3.095e-06	0.41(0.28-0.6)
71	RP5-965G21.4	1.52e-07	2.27(1.66-3.1)	0.0001	1.9614(1.4148~2.7193)		71	CTD-3025N20.3	0.02679	1.49(1.04-2.14)
72	SNHG15	2.39e-07	2.27(1.65-3.12)	0.0011	1.7464(1.2501~2.4396)		72	CTD-3157E16.1	0.03627	0.68(0.47-0.98)
73	SNHG25	0.0001507	1.8(1.32-2.44)	0.0018	1.672(1.2107~2.3091)		73	DKFZP434I0714	0.02578	0.66(0.46-0.95)
74	SNHG9	0.0004136	1.72(1.27-2.34)	0.0246	1.443(1.0481~1.9867)		74	DNAJC3-AS1	0.01582	0.64(0.45-0.92)
75	U47924.32	3.59e-08	2.4(1.74-3.31)	0	2.1827(1.566~3.0423)		75	DPH6-AS1	0.003125	0.58(0.41-0.84)
76	ZBTB20-AS4	0.0007161	0.59(0.43-0.8)	0.0227	0.6859(0.4959~0.9487)		76	EIF3J-AS1	0.0006588	0.53(0.37-0.77)
77	AC144652.1	0.0004344	1.72(1.27-2.33)				77	EPB41L4A-AS2	5.979e-08	0.36(0.24-0.53)
78	AC145343.2	0.0001632	1.8(1.32-2.45)				78	FAM95C	0.03769	0.69(0.48-0.98)
79	AC159540.1	0.001686	1.62(1.2-2.2)				79	FIRRE	0.003099	1.72(1.19-2.46)
80	AC226118.1	0.0002107	0.56(0.41-0.77)				80	FLJ22763	0.006718	0.61(0.43-0.88)
81	ADAM20P1	0.0002865	1.77(1.29-2.41)				81	FLJ37035	0.03331	0.68(0.47-0.97)
82	AF011889.2	9.31e-05	1.84(1.35-2.5)				82	FLJ38122	0.004321	0.59(0.41-0.85)
83	AF131217.1	0.0001134	1.82(1.34-2.49)				83	GAPLINC	0.03392	1.47(1.03-2.09)
84	AF186192.1	0.004438	0.64(0.47-0.87)				84	GAS6-AS2	0.001138	0.55(0.38-0.79)
85	AJ011932.1	0.03334	1.39(1.02-1.87)				85	GATA6-AS1	0.0375	1.46(1.02-2.09)
86	AP000230.1	4.88e-05	0.53(0.39-0.72)				86	GS1-166A23.2	0.02872	1.49(1.04-2.13)
87	AP000295.10	0.000198	1.8(1.31-2.46)				87	GS1-204I12.4	0.0308	0.68(0.47-0.97)
88	AP000344.3	0.003146	0.63(0.47-0.86)				88	GS1-279B7.2	0.001296	0.55(0.38-0.8)
89	AP000688.29	0.006157	1.53(1.13-2.07)				89	GS1-57L11.1	0.02878	0.67(0.47-0.96)
90	AP001055.6	0.00178	1.62(1.19-2.2)				90	HAGLROS	0.005929	0.61(0.42-0.87)
91	AP001372.2	8.24e-09	0.4(0.29-0.55)				91	HCG9	0.008056	0.62(0.43-0.88)
92	AP001432.14	0.03445	1.38(1.02-1.87)				92	ILF3-AS1	0.02343	0.66(0.46-0.95)
93	AP001505.10	2.07e-05	1.95(1.43-2.67)				93	KB-208E9.1	0.02406	0.66(0.46-0.95)
94	AP001626.1	2.72e-05	0.52(0.38-0.71)				94	LA16c-325D7.2	0.02278	1.51(1.06-2.17)
95	AP006621.5	0.008806	1.5(1.1-2.03)				95	LA16c-380H5.5	0.001393	0.56(0.39-0.8)
96	BACH1-IT2	0.0001234	1.81(1.33-2.46)				96	LINC00113	4.255e-06	0.43(0.29-0.62)
97	BAIAP2-AS1	0.03228	0.72(0.53-0.97)				97	LINC00152	0.0005517	1.89(1.31-2.72)
98	BLACAT1	6.15e-06	2.02(1.48-2.76)				98	LINC00176	0.03046	1.48(1.04-2.11)
99	BSN-AS2	0.004031	1.56(1.15-2.11)				99	LINC00235	0.03634	0.68(0.47-0.98)
100	C10orf126	0.0001358	0.56(0.41-0.76)				100	LINC00240	0.0001758	1.99(1.38-2.88)
101	C20orf203	5.35e-06	2.04(1.49-2.79)				101	LINC00271	2.937e-06	0.42(0.29-0.61)
102	C3orf35	1.78e-05	1.96(1.43-2.69)				102	LINC00441	0.01463	0.64(0.45-0.92)
103	C9orf163	6.59e-05	1.85(1.36-2.52)				103	LINC00472	0.002282	0.57(0.4-0.82)
104	C9orf170	0.007385	1.51(1.11-2.04)				104	LINC00475	0.02716	1.49(1.04-2.13)
105	CH17-264L24.1	0.0001587	1.8(1.32-2.46)				105	LINC00511	0.005166	1.66(1.16-2.37)
106	CH17-340M24.3	0.02784	1.4(1.04-1.9)				106	LINC00526	0.01391	0.64(0.45-0.92)
107	CH507-513H4.5	0.002186	1.61(1.18-2.18)				107	LINC00551	0.0001472	0.5(0.34-0.72)
108	CITF22-1A6.3	1.62e-06	2.11(1.55-2.89)				108	LINC00593	0.03903	0.69(0.48-0.98)
109	CITF22-49E9.3	0.01864	1.43(1.06-1.94)				109	LINC00605	2.394e-05	0.46(0.32-0.67)
110	CMB9-22P13.1	0.0274	1.41(1.04-1.9)				110	LINC00623	0.01189	1.58(1.1-2.26)
111	CRNDE	0.02591	1.41(1.04-1.91)				111	LINC00626	0.01037	1.6(1.11-2.3)
112	CRYM-AS1	0.00168	1.62(1.2-2.2)				112	LINC00630	0.02123	0.66(0.46-0.94)
113	CTA-126B4.7	0.02363	1.42(1.05-1.92)				113	LINC00632	0.03675	1.46(1.02-2.09)
114	CTA-217C2.2	0.003467	1.57(1.16-2.13)				114	LINC00664	3.818e-06	2.35(1.62-3.41)
115	CTA-223H9.9	1.65e-06	2.12(1.55-2.9)				115	LINC00671	8.776e-05	0.48(0.33-0.7)
116	CTA-228A9.3	0.01187	1.48(1.09-2.01)				116	LINC00694	0.0005236	1.88(1.31-2.7)
117	CTA-276F8.1	1.95e-08	2.41(1.76-3.31)				117	LINC00844	0.01924	1.53(1.07-2.19)
118	CTA-989H11.1	0.0002513	1.76(1.3-2.4)				118	LINC00883	0.004294	0.59(0.41-0.85)
119	CTB-113P19.5	0.0001437	1.82(1.33-2.49)				119	LINC00886	0.03508	0.68(0.48-0.98)
120	CTB-12O2.1	1.72e-05	1.95(1.43-2.66)				120	LINC00900	0.04925	1.43(1-2.04)
121	CTB-31O20.2	0.001217	1.65(1.21-2.24)				121	LINC00907	0.03067	0.67(0.47-0.97)
122	CTB-58E17.1	0.0001475	1.8(1.32-2.44)				122	LINC00908	0.03112	0.67(0.47-0.97)
123	CTB-61M7.2	0.0001826	1.79(1.31-2.43)				123	LINC00909	0.001988	0.57(0.4-0.82)
124	CTC-1337H24.4	1.31e-05	1.97(1.44-2.69)				124	LINC00941	0.002749	1.72(1.2-2.47)
125	CTC-297N7.9	0.0009379	0.6(0.44-0.81)				125	LINC00942	0.00186	1.77(1.23-2.55)
126	CTC-301O7.4	0.006124	1.53(1.13-2.07)				126	LINC00944	7.39e-06	2.33(1.59-3.4)
127	CTC-366B18.4	0.001924	1.61(1.19-2.19)				127	LINC00950	0.04188	0.69(0.48-0.99)
128	CTC-444N24.11	0.0004894	1.72(1.26-2.34)				128	LINC00959	0.03658	0.68(0.48-0.98)
129	CTC-444N24.8	1.84e-06	2.13(1.55-2.92)				129	LINC00964	3.511e-05	0.45(0.31-0.67)
130	CTC-479C5.10	1.62e-05	1.97(1.44-2.69)				130	LINC00997	1.242e-08	2.96(2-4.38)
131	CTC-497E21.3	0.01573	0.69(0.51-0.93)				131	LINC01060	0.0001592	0.49(0.34-0.72)
132	CTC-513N18.6	0.01241	0.68(0.5-0.92)				132	LINC01085	0.04239	1.44(1.01-2.06)
133	CTC-523E23.1	5.75e-05	0.54(0.39-0.73)				133	LINC01117	0.007245	0.62(0.43-0.88)
134	CTC-523E23.4	9.95e-06	0.5(0.37-0.68)				134	LINC01122	0.001119	1.81(1.26-2.6)
135	CTC-542B22.2	0.0001283	1.82(1.33-2.49)				135	LINC01124	0.003079	1.71(1.19-2.45)
136	CTC-559E9.4	0.04936	0.74(0.54-1)				136	LINC01132	0.0003468	0.51(0.36-0.75)
137	CTC-573N18.1	0.0004074	1.74(1.27-2.37)				137	LINC01134	0.02146	1.52(1.06-2.17)
138	CTC-786C10.1	0.0009772	0.6(0.44-0.81)				138	LINC01135	0.03327	0.68(0.48-0.97)
139	CTD-2007L18.5	0.02005	1.44(1.06-1.95)				139	LINC01138	2.431e-06	2.42(1.66-3.54)
140	CTD-2012K14.6	2.86e-06	2.08(1.52-2.84)				140	LINC01186	0.03634	0.68(0.48-0.98)
141	CTD-2015G9.2	0.001648	0.62(0.45-0.84)				141	LINC01187	0.0372	0.69(0.48-0.98)
142	CTD-2027I19.3	0.004433	1.55(1.14-2.11)				142	LINC01191	0.02951	1.49(1.04-2.13)
143	CTD-2035E11.4	6.66e-06	2.02(1.48-2.76)				143	LINC01215	0.01586	0.65(0.45-0.92)
144	CTD-2035E11.5	1.42e-08	2.47(1.79-3.4)				144	LINC01270	0.006166	1.64(1.15-2.35)
145	CTD-2044J15.1	0.006002	1.53(1.13-2.08)				145	LINC01271	0.02647	1.49(1.05-2.13)
146	CTD-2078B5.2	0.0284	0.71(0.53-0.97)				146	LINC01301	0.03628	1.46(1.02-2.09)
147	CTD-2145A24.5	0.00187	1.62(1.19-2.21)				147	LINC01330	0.006611	0.61(0.43-0.87)
148	CTD-2199O4.6	0.002269	1.6(1.18-2.17)				148	LINC01336	0.02511	0.67(0.47-0.95)
149	CTD-2227E11.1	3.26e-05	1.91(1.4-2.61)				149	LINC01428	0.04329	0.69(0.48-0.99)
150	CTD-2245F17.3	0.04167	0.73(0.54-0.99)				150	LINC01436	3.197e-05	2.15(1.49-3.12)
151	CTD-2246P4.1	1.98e-06	2.12(1.55-2.91)				151	LINC01470	0.013	1.57(1.1-2.25)
152	CTD-2302E22.6	0.04501	1.36(1.01-1.84)				152	LINC01508	0.01338	0.64(0.44-0.91)
153	CTD-2306A12.1	3.96e-05	1.9(1.39-2.59)				153	LINC01510	0.0002628	0.51(0.36-0.74)
154	CTD-2325M2.1	0.01047	1.48(1.09-2.01)				154	LINC01521	0.02906	0.67(0.47-0.96)
155	CTD-2331H12.7	0.04854	1.36(1-1.84)				155	LINC01550	0.0001762	0.5(0.35-0.73)
156	CTD-2337I7.1	0.0001705	1.79(1.31-2.43)				156	LINC01558	0.002807	0.58(0.4-0.83)
157	CTD-2341M24.1	0.0001217	1.82(1.34-2.49)				157	LINC01559	0.011	1.59(1.11-2.28)
158	CTD-2342N23.3	0.004001	1.56(1.15-2.11)				158	LINC01569	0.01822	1.54(1.07-2.2)
159	CTD-2349P21.9	1.61e-05	1.96(1.43-2.67)				159	LINC01605	0.006123	1.65(1.15-2.36)
160	CTD-2410N18.3	0.04582	0.74(0.54-1)				160	LUCAT1	0.001868	1.77(1.23-2.54)
161	CTD-2532N20.1	0.006531	1.52(1.12-2.06)				161	MIR22HG	0.001311	0.55(0.38-0.8)
162	CTD-2538C1.2	0.004416	1.55(1.14-2.1)				162	MIR4458HG	0.01566	0.65(0.45-0.92)
163	CTD-2547G23.4	0.0001287	1.82(1.33-2.48)				163	MIR99AHG	0.01291	0.64(0.44-0.91)
164	CTD-2554C21.2	0.02456	0.71(0.52-0.96)				164	PCAT1	0.0473	0.7(0.49-1)
165	CTD-2554C21.3	0.01387	0.68(0.5-0.93)				165	PGM5P2	0.03508	0.68(0.48-0.98)
166	CTD-2561B21.11	0.01042	1.49(1.1-2.02)				166	PGM5P4-AS1	0.0313	0.68(0.48-0.97)
167	CTD-2587H24.10	9.11e-05	1.83(1.35-2.5)				167	PSMG3-AS1	0.000953	0.55(0.38-0.79)
168	CTD-2587M2.1	0.0007897	1.69(1.24-2.3)
169	CTD-2619J13.17	0.0006609	0.58(0.43-0.8)
170	CTD-2666L21.1	0.000812	0.59(0.43-0.81)
171	CTD-3025N20.3	0.0004297	1.73(1.27-2.36)
172	CTD-3051D23.1	0.002371	1.6(1.18-2.18)
173	CTD-3116E22.7	0.03373	1.39(1.02-1.88)
174	CTD-3131K8.2	0.0002488	1.77(1.3-2.41)
175	CTD-3162L10.1	0.003109	1.58(1.16-2.15)
176	CTD-3179P9.1	0.01565	0.69(0.51-0.93)
177	CTD-3220F14.1	0.006046	1.53(1.13-2.08)
178	CTD-3234P18.6	0.01924	1.44(1.06-1.95)
179	CTD-3252C9.4	0.002956	1.58(1.17-2.15)
180	CYP4A22-AS1	0.006092	1.52(1.13-2.06)
181	CYP4F35P	0.005175	1.54(1.14-2.09)
182	DIO3OS	0.009242	1.5(1.1-2.03)
183	DKFZP434A062	0.001355	1.64(1.21-2.23)
184	DPH6-AS1	0.02442	0.71(0.52-0.96)
185	EIF3J-AS1	0.001715	0.61(0.45-0.84)
186	EPB41L4A-AS1	0.002201	0.62(0.46-0.85)
187	EPB41L4A-AS2	6.13e-09	0.39(0.29-0.55)
188	EWSAT1	0.02182	1.42(1.05-1.93)
189	FAM215B	0.01185	1.48(1.09-2.01)
190	FAM27C	0.03638	0.73(0.54-0.98)
191	FAM87B	0.02868	1.4(1.03-1.9)
192	FENDRR	0.0009033	0.6(0.44-0.81)
193	FGF14-AS2	0.03584	0.72(0.53-0.98)
194	FLJ22763	2.83e-05	0.52(0.38-0.71)
195	FLJ37035	0.001168	0.61(0.45-0.82)
196	FLJ38122	0.0008132	0.59(0.44-0.81)
197	GAPLINC	0.02152	1.42(1.05-1.93)
198	GAS6-AS2	0.03734	0.72(0.53-0.98)
199	GATA6-AS1	0.0001059	1.83(1.34-2.49)
200	GLIS2-AS1	0.03267	0.72(0.53-0.97)
201	GS1-124K5.3	0.01333	1.46(1.08-1.98)
202	GS1-166A23.2	1.39e-06	2.15(1.56-2.95)
203	GS1-204I12.4	0.0004695	0.58(0.43-0.79)
204	GS1-279B7.2	0.0009346	0.6(0.44-0.81)
205	HAGLROS	0.0254	0.71(0.52-0.96)
206	HAR1A	0.002058	1.61(1.19-2.19)
207	HCCAT5	0.01096	0.67(0.5-0.92)
208	IBA57-AS1	0.002523	1.59(1.17-2.16)
209	KANTR	0.0062	1.52(1.12-2.07)
210	KB-1732A1.1	0.003295	1.58(1.16-2.15)
211	KB-226F1.2	0.001958	1.61(1.19-2.19)
212	KB-68A7.1	0.007221	1.51(1.12-2.05)
213	LA16c-325D7.2	0.0001089	1.82(1.34-2.49)
214	LA16c-380H5.5	0.03019	0.72(0.53-0.97)
215	LA16c-OS12.2	0.00681	1.52(1.12-2.06)
216	LCMT1-AS1	0.0003856	1.73(1.27-2.35)
217	LINC00106	0.006674	1.52(1.12-2.07)
218	LINC00113	1.11e-05	0.51(0.37-0.69)
219	LINC00152	0.0006467	1.7(1.25-2.32)
220	LINC00174	5.82e-06	2.04(1.49-2.79)
221	LINC00176	0.0002136	1.78(1.31-2.42)
222	LINC00202-1	0.009783	1.49(1.1-2.02)
223	LINC00216	0.004447	1.55(1.14-2.11)
224	LINC00222	0.02569	1.41(1.04-1.91)
225	LINC00239	0.001954	1.61(1.19-2.18)
226	LINC00265	0.000287	1.76(1.29-2.4)
227	LINC00271	1.78e-06	0.47(0.34-0.65)
228	LINC00299	0.0005813	1.71(1.26-2.33)
229	LINC00304	0.001256	1.65(1.21-2.24)
230	LINC00327	0.006244	1.53(1.12-2.07)
231	LINC00334	0.001255	1.65(1.21-2.23)
232	LINC00336	0.02555	1.41(1.04-1.91)
233	LINC00342	0.0005282	1.71(1.26-2.33)
234	LINC00471	0.03251	1.39(1.03-1.88)
235	LINC00472	0.0137	0.68(0.5-0.93)
236	LINC00475	0.0008696	1.67(1.23-2.26)
237	LINC00488	9.78e-05	1.83(1.34-2.5)
238	LINC00506	0.0004074	1.73(1.27-2.35)
239	LINC00511	0.0002665	1.75(1.29-2.38)
240	LINC00526	0.001027	0.6(0.44-0.82)
241	LINC00540	0.04016	1.37(1.01-1.86)
242	LINC00551	0.0002796	0.57(0.42-0.77)
243	LINC00595	0.04191	1.37(1.01-1.85)
244	LINC00605	3.56e-08	0.42(0.31-0.58)
245	LINC00607	3.73e-05	1.9(1.39-2.59)
246	LINC00623	0.0004453	1.72(1.27-2.34)
247	LINC00632	0.0002092	1.78(1.31-2.43)
248	LINC00664	1.02e-05	2(1.46-2.73)
249	LINC00665	0.004346	0.64(0.48-0.87)
250	LINC00671	0.0002246	0.56(0.41-0.77)
251	LINC00672	0.02149	1.43(1.05-1.93)
252	LINC00694	0.001264	1.65(1.21-2.24)
253	LINC00861	0.02753	1.41(1.04-1.91)
254	LINC00862	0.0001542	1.79(1.32-2.44)
255	LINC00869	0.0001412	1.81(1.33-2.46)
256	LINC00880	0.01148	1.47(1.09-1.99)
257	LINC00883	5.65e-05	0.53(0.39-0.73)
258	LINC00900	0.001429	1.64(1.21-2.23)
259	LINC00909	0.009125	0.67(0.49-0.91)
260	LINC00942	5.1e-05	1.89(1.38-2.58)
261	LINC00944	0.0003616	1.75(1.28-2.39)
262	LINC00950	0.02486	0.71(0.52-0.96)
263	LINC00954	0.001022	1.66(1.22-2.26)
264	LINC00961	0.002166	0.62(0.46-0.85)
265	LINC00997	8.05e-05	1.85(1.36-2.53)
266	LINC01001	0.01411	1.46(1.08-1.98)
267	LINC01011	0.01468	1.46(1.08-1.98)
268	LINC01057	0.01153	1.48(1.09-2)
269	LINC01085	0.0001555	1.8(1.32-2.45)
270	LINC01089	0.0002296	1.78(1.3-2.42)
271	LINC01116	0.02617	0.71(0.53-0.96)
272	LINC01117	0.00501	0.65(0.48-0.88)
273	LINC01122	0.002853	1.58(1.17-2.15)
274	LINC01124	0.003292	1.57(1.16-2.13)
275	LINC01126	0.009194	1.49(1.1-2.03)
276	LINC01127	0.0337	1.39(1.02-1.87)
277	LINC01132	2.84e-05	0.52(0.38-0.71)
278	LINC01134	0.0004721	1.72(1.26-2.34)
279	LINC01141	0.02924	1.4(1.03-1.9)
280	LINC01146	0.03055	1.4(1.03-1.89)
281	LINC01160	5.3e-06	2.03(1.49-2.77)
282	LINC01176	0.0005397	1.71(1.26-2.33)
283	LINC01183	0.004813	1.55(1.14-2.1)
284	LINC01252	0.0141	1.46(1.08-1.98)
285	LINC01301	0.002573	1.59(1.17-2.16)
286	LINC01330	0.008841	0.67(0.49-0.91)
287	LINC01355	0.0003489	1.74(1.28-2.38)
288	LINC01372	0.004461	1.55(1.14-2.11)
289	LINC01393	0.01838	1.44(1.06-1.95)
290	LINC01410	0.007047	1.51(1.12-2.05)
291	LINC01415	0.007645	0.66(0.49-0.9)
292	LINC01422	0.0004018	1.73(1.27-2.36)
293	LINC01431	0.02138	1.42(1.05-1.93)
294	LINC01436	4.59e-06	2.05(1.5-2.81)
295	LINC01451	0.008569	1.5(1.11-2.03)
296	LINC01460	0.0005027	1.72(1.26-2.33)
297	LINC01470	0.04139	1.37(1.01-1.85)
298	LINC01503	0.04898	1.35(1-1.83)
299	LINC01506	0.02442	0.71(0.52-0.96)
300	LINC01508	0.01475	0.69(0.51-0.93)
301	LINC01510	9.14e-05	0.54(0.4-0.74)
302	LINC01521	0.002432	0.62(0.45-0.85)
303	LINC01535	0.04101	1.37(1.01-1.86)
304	LINC01550	1.25e-06	0.47(0.34-0.64)
305	LINC01569	0.0002959	1.75(1.29-2.39)
306	LINC01572	0.01324	1.47(1.08-1.99)
307	LINC01588	0.0002852	1.75(1.29-2.38)
308	LINC01607	0.001069	1.66(1.22-2.26)
309	LL0XNC01-7P3.1	0.0009071	1.68(1.23-2.28)
310	LLNLR-246C6.1	4.04e-06	2.07(1.51-2.83)
311	LUCAT1	3.83e-06	2.06(1.51-2.82)
312	MAPKAPK5-AS1	0.0003062	1.75(1.29-2.38)
313	MEG3	0.004601	1.55(1.14-2.11)
314	MEG8	0.03038	1.4(1.03-1.9)
315	MEG9	0.00562	1.54(1.13-2.09)
316	MGC45922	0.005672	1.53(1.13-2.08)
317	MIAT	7.04e-07	2.18(1.59-2.99)
318	MIR100HG	0.01672	0.69(0.51-0.94)
319	MIR155HG	0.00333	1.58(1.16-2.14)
320	MIR222HG	1.3e-06	2.12(1.55-2.9)
321	MIR4435-2HG	0.03009	1.4(1.03-1.89)
322	MIR503HG	0.0008394	1.67(1.23-2.27)
323	MIRLET7BHG	0.0006206	1.7(1.25-2.31)
324	NEAT1	0.02068	1.43(1.05-1.94)
325	NUP50-AS1	2.45e-05	1.94(1.42-2.64)
326	OLMALINC	0.02142	1.42(1.05-1.93)
327	OSMR-AS1	0.0001114	1.82(1.34-2.47)
328	PACERR	5.37e-07	2.19(1.6-3)
329	PCAT19	0.02119	0.7(0.52-0.95)
330	PKI55	0.003307	0.63(0.47-0.86)
331	PSMG3-AS1	0.003628	0.64(0.47-0.87)
332	PTGES2-AS1	0.007171	1.51(1.12-2.05)
333	PVT1	0.0003203	1.75(1.28-2.38)
334	RNF139-AS1	6.34e-05	1.87(1.37-2.55)
335	RP1-102E24.8	0.0006704	1.69(1.25-2.3)
336	RP1-136B1.1	0.006298	1.52(1.12-2.06)
337	RP1-137D17.2	0.01588	1.45(1.07-1.96)
338	RP1-149A16.17	0.03626	1.38(1.02-1.87)
339	RP1-182D15.2	0.009867	1.49(1.1-2.03)
340	RP1-197B17.4	0.03571	1.38(1.02-1.87)
341	RP1-224A6.9	1.39e-06	2.13(1.56-2.92)
342	RP1-228P16.8	0.0001153	1.83(1.34-2.5)
343	RP1-276N6.2	0.01375	0.68(0.5-0.93)
344	RP1-27K12.2	0.01036	0.67(0.5-0.91)
345	RP1-302G2.5	0.000432	1.73(1.27-2.35)
346	RP1-41C23.4	0.03278	1.39(1.03-1.88)
347	RP1-63M2.7	1.59e-05	1.95(1.43-2.66)
348	RP1-86C11.7	0.00418	1.55(1.15-2.11)
349	RP1-93H18.1	0.01374	1.46(1.08-1.98)
350	RP11-1000B6.5	0.001678	1.62(1.2-2.21)
351	RP11-1007O24.2	8.24e-05	1.84(1.35-2.51)
352	RP11-1008C21.2	0.008636	0.67(0.49-0.9)
353	RP11-100L22.1	0.000124	0.55(0.41-0.75)
354	RP11-1018N14.5	0.01077	0.68(0.5-0.91)
355	RP11-102K13.5	3.45e-05	1.9(1.39-2.58)
